# Supplementary material for: Nonribosomal Peptide Synthetases in Animals
Source: MDPI journal article supplement (doi:10.3390/genes14091741), 2023-08-30
Supplement: s1 [file s1]

**Supplementary Table S3.** The beta-lactam biosynthesis proteins that were used to search for beta-lactam genes in the genome of the nematode *Plectus sambesii*. Abbreviations: IPNS: isopenicillin N synthase; IPN:AT: isopenicillin N N-acyltransferase; DAOC: deacetoxycephalosporin C; DAC deacetylcephalosporin.

| UniProt ID      | Protein                                       | Gene  | Species                          |
|-----------------|-----------------------------------------------|-------|----------------------------------|
| P18549          | IPNS                                          | pcbC  | <i>Streptomyces clavuligerus</i> |
| P15802          | IPN:AT                                        | penDE | <i>Penicillium chrysogenum</i>   |
| P18549          | IPN: epimerase                                | cefD  | <i>Streptomyces clavuligerus</i> |
| P18548          | DAOC synthase                                 | cefE  | <i>Streptomyces clavuligerus</i> |
| P42220          | DAOC hydroxylase                              | cefF  | <i>Streptomyces clavuligerus</i> |
| P39058          | DAC acetyltransferase                         | cefG  | <i>Acremonium chrysogenum</i>    |
| B5GZH3          | 3'-hydroxymethylcephem-O-carbamoyltransferase | cmcH  | <i>Streptomyces clavuligerus</i> |
| NA <sup>1</sup> | O-carbamoyl DAC                               | cmcI  | <i>Folsomia candida</i>          |
| NA <sup>2</sup> | 7-alpha-cephem-methoxylase                    | cmcJ  | <i>Folsomia candida</i>          |

<sup>1</sup> Protein sequence:

MEPSTTNESKDLVEGNFVDLHRLRGLGDDPVYYPPILEDPRPLWPLDKWSSAPRDLGYDNFATEHWKGL  
RLLKDPETQSVYHNILWEIKPKTIIELGVYSGGSLVWFRDLTKAFKFPSRLIGIDIDLSRCQIPEGEMDMISLH  
QADCNNPESFAFLKDNVEHPILFIDDAHCNTFNVIKYAVNNFLKVGDFVMIEDTMGMWGRYSPKHLKS  
HLASFKDVMALDLLYSNVPCQLKDGVFQVIKSN

<sup>2</sup> Protein sequence:

MIKIKPGRDVQATINYSRSSTTEKWFIDTISCPNGNKITNAENDPISTTIHDLRGVEHNFSLDKNGFQAIFSP  
TSVPSNTLLSGGDVLKTVYYPEVEKLLMEVTGADKAVAFDHTIRQSQVNSETWLHRLPVMRAHVDQTPK  
SAWGRIALHSPEVQSFYRFQIINVWRPIVNIVDYDPLTMADFRSLNLHVDLMPTDLRYPEVWVKDKETYSV  
KWNRSRAWYWSCMTPDEVLMACYDSASQRLAEAYPLPLERGNRNLYCSESVAGLAPHTAFYDEKAS  
MKGSGRKSIEIRTLVFYK

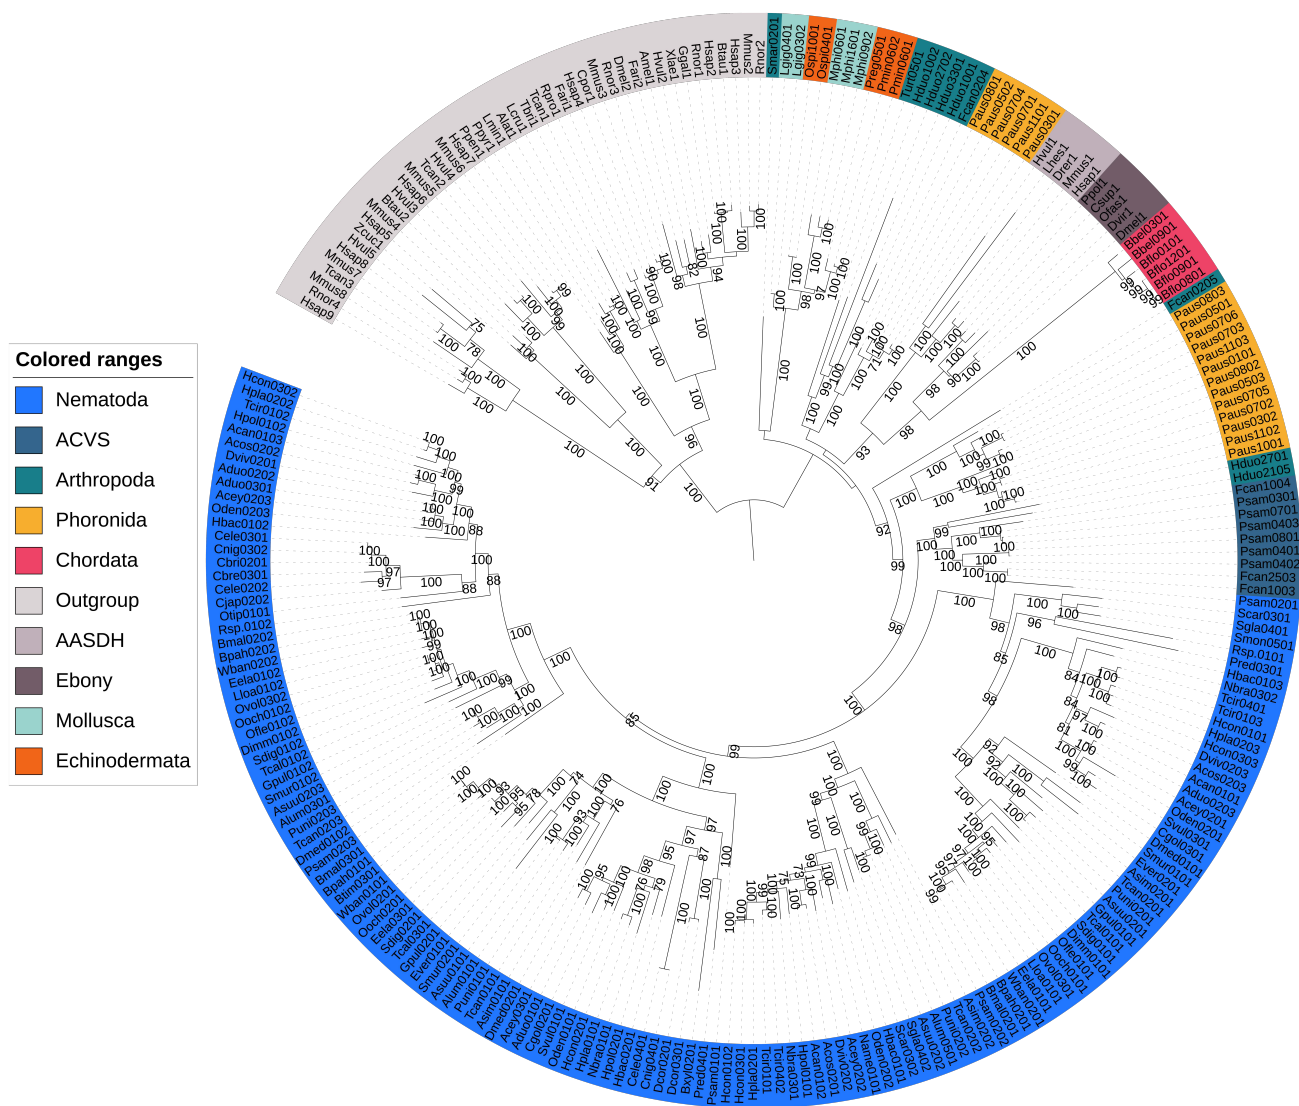

**Supplementary Figure S1.** A phylogenetic tree of identified putative NRPS adenylation domains in animals including all nematode sequences. The nematodes form a monophyletic clade except for several *Plectus sambesii* sequences that cluster with ACVS proteins of the springtail *F. candida*. Compared to Figure 2, the Mollusca, Echinodermata and a group of Arthropoda have moved and diverge before AASDH and Ebony (but with low support). Bootstrap support >70% is shown. The adenylation domains of outgroup proteins (Supplementary Table S2) and putative NRPSs were aligned using Clustal Omega version 1.2.4 and columns with <70% coverage were trimmed. The phylogenetic tree was inferred with IQTREE version 2.0.6 (Minh et al., 2020) using the LG+F+R8 model with 1000 bootstrap replicates.
